# Supplementary material for: Noble-metal nanoparticle labelling multiplex miRNAs by ICP-MS readout with internal standard isotopes of 115In and 209Bi
Source: Royal Society of Chemistry journal article supplement (doi:10.1039/d0an01975e), 2021-01-01
Supplement: d0an01975e1.pdf [file d0an01975e1.pdf]

## Electronic Supplementary Information

Noble-Metal nanoparticle Labelling Multiplex MiRNAs by ICP-MS Readout with  
internal standard isotopes of  $^{115}\text{In}$  and  $^{209}\text{Bi}$

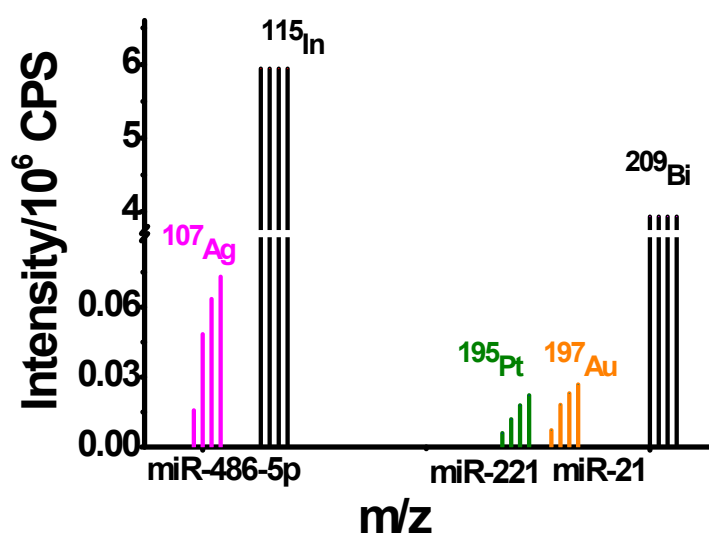

**Figure S1.** ICP-MS mass spectrogram of the multiplexed miRNAs in the serum with the concentrations of 0 pM (blank sample), 1 pM, 10 pM and 50 pM. (The internal standard concentration of  $^{115}\text{In}$  and  $^{209}\text{Bi}$  are 1.0 mg/L)
